# Supplementary material for: Simvastatin may induce insulin resistance through a novel fatty acid mediated cholesterol independent mechanism
Source: PubMed Central journal article supplement (PMC4561915; doi:10.1038/srep13823), 2015-09-08

# **Simvastatin may induce insulin resistance through a novel fatty acid mediated cholesterol independent mechanism**

**Vasundhara Kain\*<sup>£1</sup>, Bandish Kapadia\*<sup>1</sup>, Parimal Misra\*<sup>¶</sup> and Uday Saxena\*\*<sup>¶</sup>**

\*Department of Biology, Dr. Reddy's Institute of Life Sciences, University of Hyderabad Campus, Hyderabad, Andhra Pradesh, India,\*\* Kareus Therapeutics, SA, Switzerland

¶ Correspondence and request for materials should be addressed to PM ([parimalm@drils.org](mailto:parimalm@drils.org)) or US ([usaxena@kareustherapeutics.com](mailto:usaxena@kareustherapeutics.com)).

£Current address Division of Cardiovascular disease, School of Medicine, The University of Alabama Birmingham, Alabama, USA.

<sup>1</sup>Both authors contributed equally to this work.

## Supplemental Methods

Cytotoxicity assay: L6 Cells were treated with different concentrations of Simvastatin and Atorvastatin for 48 h and then incubated with 5 mg/ml MTT for 4 h at 37°C. Medium was then removed and 200 µl of DMSO was added to dissolve the crystal. Absorbance was measured at a wavelength of 490 nm using multiplate reader (Perkin-Elmer, Waltham, Massachusetts, USA).

## **Supplemental Figure legends**

Supplemental Figure 1: Differentiation of L6 myoblasts to L6 myotubes

Supplemental Figure 2: MTT assay for assessing the cells viability for L6 cells post treatment of the different concentrations of simvastatin and atorvastatin as mentioned.

Supplemental Figure 3: Densitometric quantification of the blots of Figure 4d

Supplemental Figure 4: Full blot images for the cropped western blot films.

Supplemental Figure 1

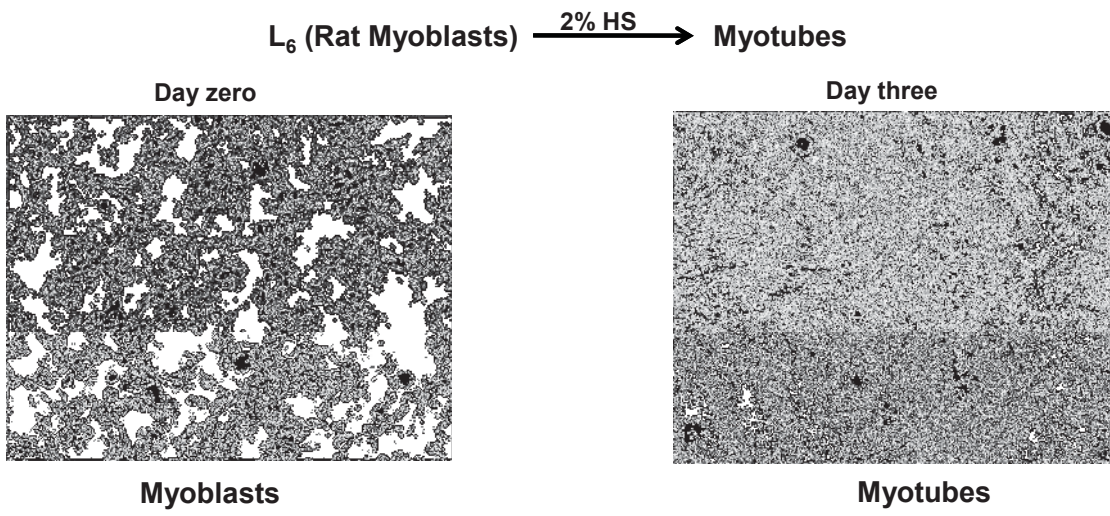

Supplemental Figure 2

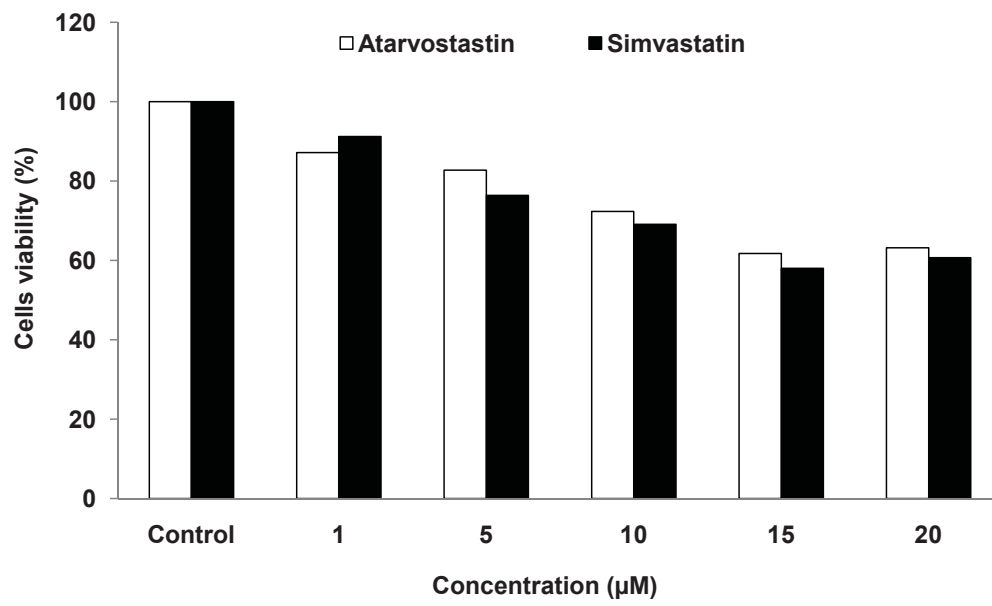

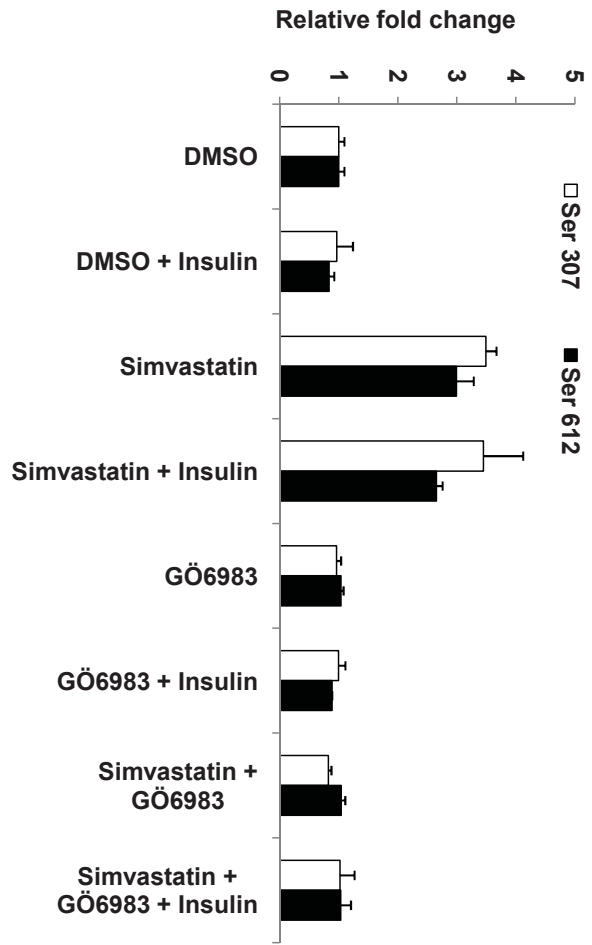

Supplemental Figure 3

Supplemental Figure 4

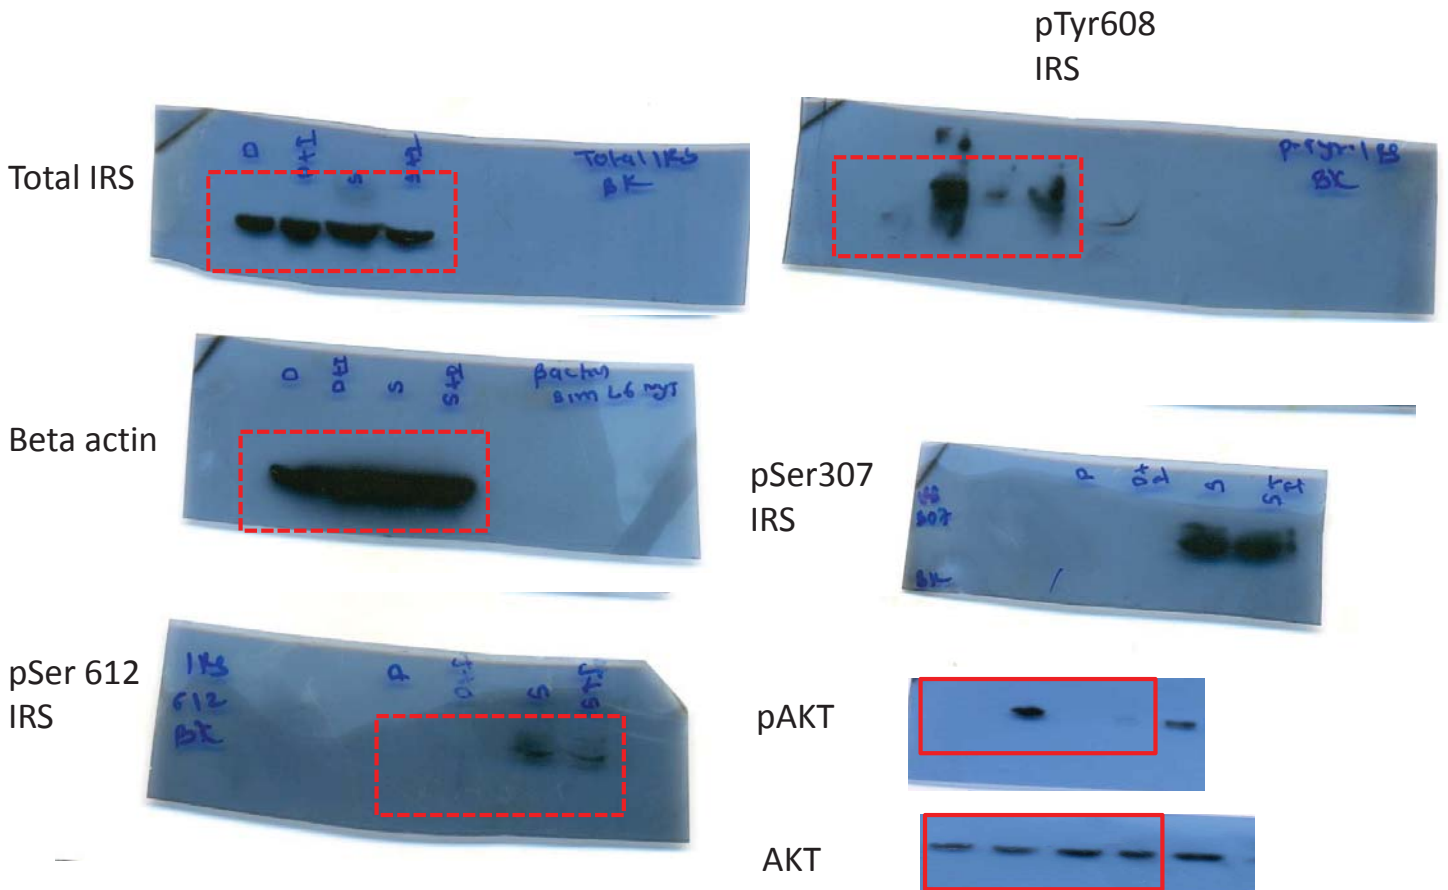

Supplemental Figure 4

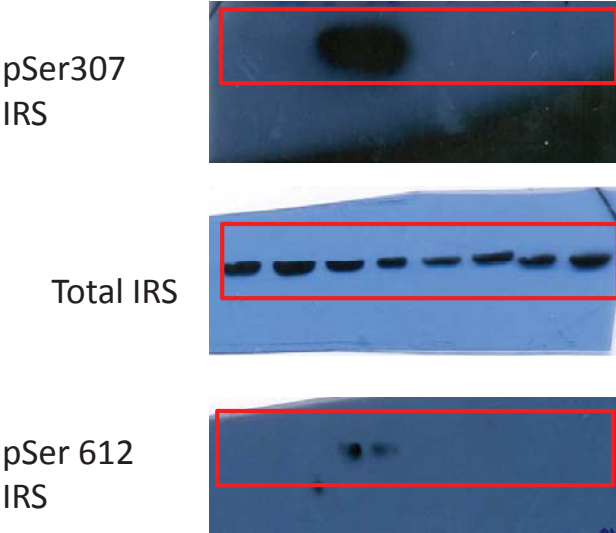

Supplement: srep13823-s1.pdf [file srep13823-s1.pdf]
